# Supplementary material for: Design of Crosslinked Hydrogels Comprising Poly(Vinylphosphonic Acid) and Bis[2-(Methacryloyloxy)Ethyl] Phosphate as an Efficient Adsorbent for Wastewater Dye Removal
Source: PubMed Central journal article supplement (PMC7023366; doi:10.3390/nano10010131), 2020-01-10
Supplement: nanomaterials-10-00131-s001.pdf [file nanomaterials-10-00131-s001.pdf]

## Supplementary Material

### List OF Supplementary Tables

**Table S1.** Parameters and  $R^2$  values of two-step linear plots of IPD model.

| Adsorbent       | $C_0$ | 1st Step |        |       | 2nd Step |       |       |
|-----------------|-------|----------|--------|-------|----------|-------|-------|
|                 |       | $k_{d1}$ | $C_1$  | $R^2$ | $k_{d2}$ | $C_2$ | $R^2$ |
| PVPA-BMEP (5%)  | 100   | 6.29     | 146    | 0.893 | 0.017    | 184   | 0.994 |
|                 | 500   | 34.5     | 683    | 0.972 | 0.351    | 894   | 0.994 |
|                 | 1500  | 148      | 1490   | 0.983 | 11.0     | 2424  | 0.823 |
| PVPA-BMEP (10%) | 100   | 8.66     | 144    | 0.996 | 0.034    | 192   | 0.994 |
|                 | 500   | 38.5     | 692    | 0.981 | 0.351    | 929   | 0.994 |
|                 | 1500  | 147      | 1603   | 0.937 | 1.05     | 2659  | 0.994 |
| PVPA-BMEP (20%) | 100   | 12.7     | 124    | 0.999 | 0.198    | 194   | 0.994 |
|                 | 500   | 128      | 239    | 0.973 | 0.499    | 951   | 0.972 |
|                 | 1500  | 428      | -78.5  | 0.994 | 5.99     | 2690  | 0.872 |
| PVPA-BMEP (40%) | 100   | 20.6     | 79.8   | 0.979 | 0.143    | 195   | 0.854 |
|                 | 500   | 199      | -150   | 0.995 | 0.204    | 963   | 0.924 |
|                 | 1500  | 639      | -1,276 | 0.995 | 1.60     | 2784  | 0.987 |

List of Supplementary Figures

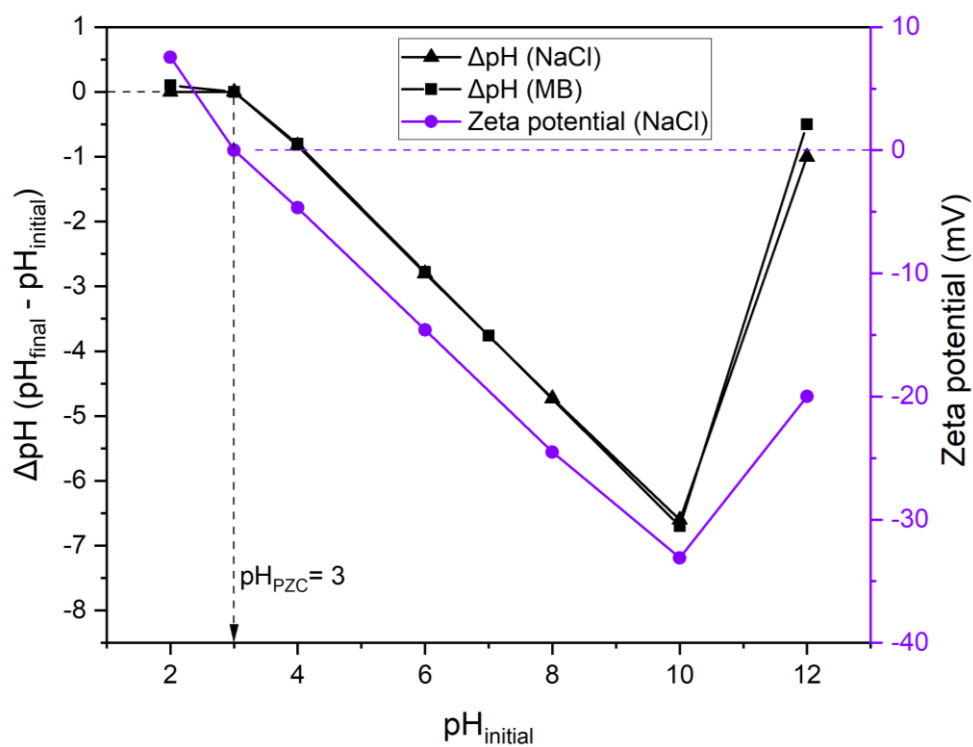

Figure S1. Zeta potential and  $\Delta\text{pH}$  plots of PVPA-BMEP (40%) hydrogel at different  $\text{pH}_{\text{initial}}$  values.

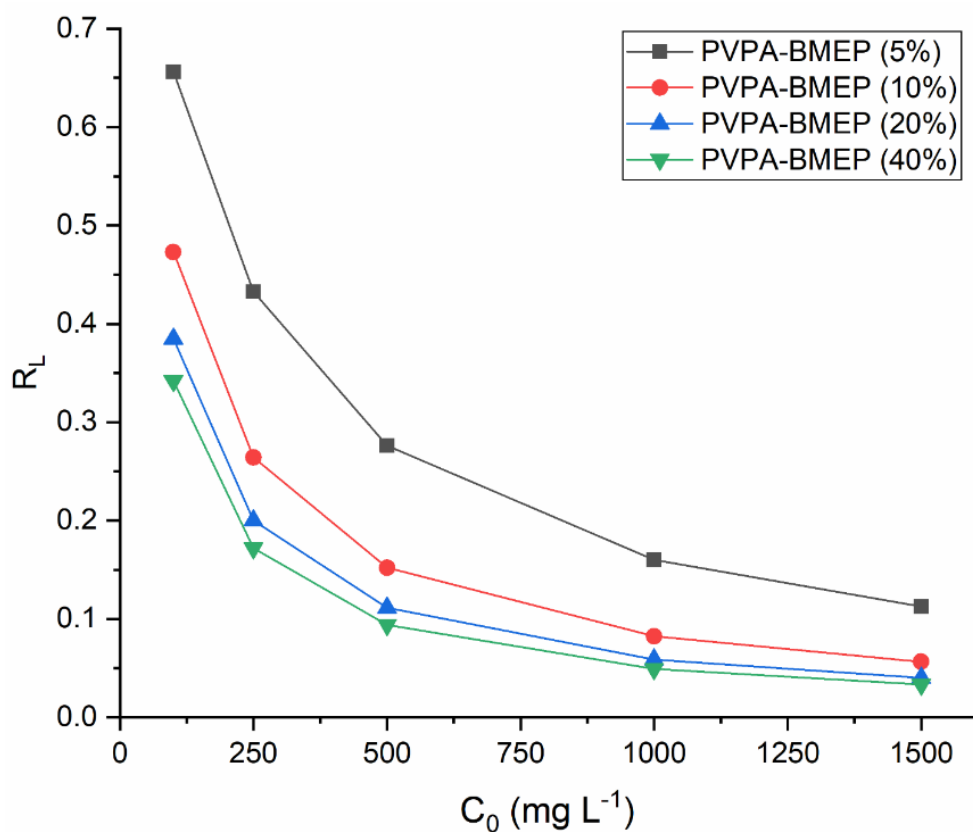

Figure S2. The change in  $R_L$  value of each hydrogel within the studied  $C_0$  range.
